# Supplementary material
Source: Springer Nature journal article supplement (https://www.springermedizin.de/resource/supplementary/12889_2013_6814_MOESM5_ESM.pdf/9499042)
Supplement: MOESM5 [file 9499042]

**Table 4: Prevalence of specific low-risk HPV, among Nigerian women**

| <b>Low-risk<br/>HPV Type</b> | <b>Age ≤ 36 years</b> | <b>Age &gt; 36 years</b> | <b>P-value</b> |
|------------------------------|-----------------------|--------------------------|----------------|
|                              | <b>N (%)</b>          | <b>N (%)</b>             |                |
| <b>HPV 6</b>                 | 2 (1.5)               | 2 (1.5)                  | 1.0            |
| <b>HPV 11</b>                | 2 (1.5)               | 1 (0.7)                  | 0.62           |
| <b>HPV 26</b>                | -                     | 1 (0.7)                  | 1.0            |
| <b>HPV 40</b>                | 2 (1.5)               | -                        | 0.24           |
| <b>HPV 42</b>                | 9 (6.8)               | 4 (2.9)                  | 0.16           |
| <b>HPV 53</b>                | 5 (3.8)               | 3 (2.2)                  | 0.49           |
| <b>HPV 54</b>                | 8 (6.0)               | 1 (0.7)                  | 0.02           |
| <b>HPV 55</b>                | 3 (2.3)               | 1 (0.7)                  | 0.36           |
| <b>HPV 61</b>                | 4 (3.0)               | 3 (2.2)                  | 0.72           |
| <b>HPV 62</b>                | 11 (8.3)              | 1 (0.7)                  | 0.002          |
| <b>HPV 64</b>                | -                     | -                        |                |
| <b>HPV 66</b>                | 5 (3.8)               | 1 (0.7)                  | 0.11           |
| <b>HPV 67</b>                | -                     | 1 (0.7)                  | 1.0            |
| <b>HPV 69</b>                | 2 (1.5)               | -                        | 0.24           |
| <b>HPV 70</b>                | 7 (5.3)               | 3 (2.2)                  | 0.21           |
| <b>HPV 71</b>                | -                     | -                        |                |
| <b>HPV 72</b>                | 3 (2.3)               | 1 (0.7)                  | 0.36           |
| <b>HPV 73</b>                | 2 (1.5)               | 1 (0.7)                  | 0.62           |
| <b>HPV 81</b>                | 11 (8.3)              | 2 (1.5)                  | 0.01           |
| <b>HPV 82</b>                | 1 (0.7)               | -                        | 0.49           |
| <b>HPV 83</b>                | 8 (6.0)               | -                        | 0.003          |
| <b>HPV 84</b>                | 6 (4.5)               | 2 (1.5)                  | 0.17           |
| <b>IS39</b>                  | 1 (0.7)               | -                        | 0.49           |
| <b>CP6108</b>                | 2 (1.5)               | 1 (0.7)                  | 0.62           |
